# Supplementary material
Source: MDPI journal article supplement (https://www.mdpi.com/2073-4395/14/2/392)
Supplement: s1 [file s1]

**Table S2.** pH of soils at the start and end of study.

|                     | CK    | ON    | CN    | OCN   | CN+BC |
|---------------------|-------|-------|-------|-------|-------|
| Original value      |       |       | 4.74  |       |       |
| At the end of study | 4.55a | 4.88a | 4.73a | 4.78a | 4.95a |
