# Supplementary material
Source: MDPI journal article supplement (https://www.mdpi.com/2073-4395/14/2/392)

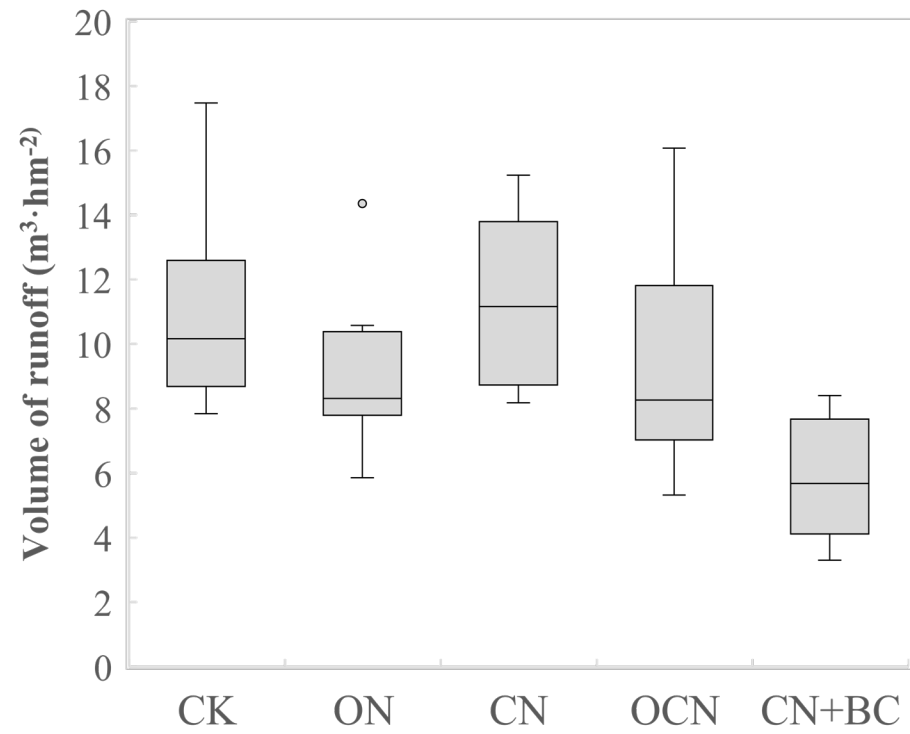

**Figure S1.** Runoff volume for all treatments and events

Supplement: s1 [file s1]
